# Supplementary material
Source: publisher site journal article supplement (https://www.dovepress.com/article/578211)
Supplement: Supplementary file 1 [file 578211%20Revised%20Figure%20S1-S2.docx]

**Supplementary information**


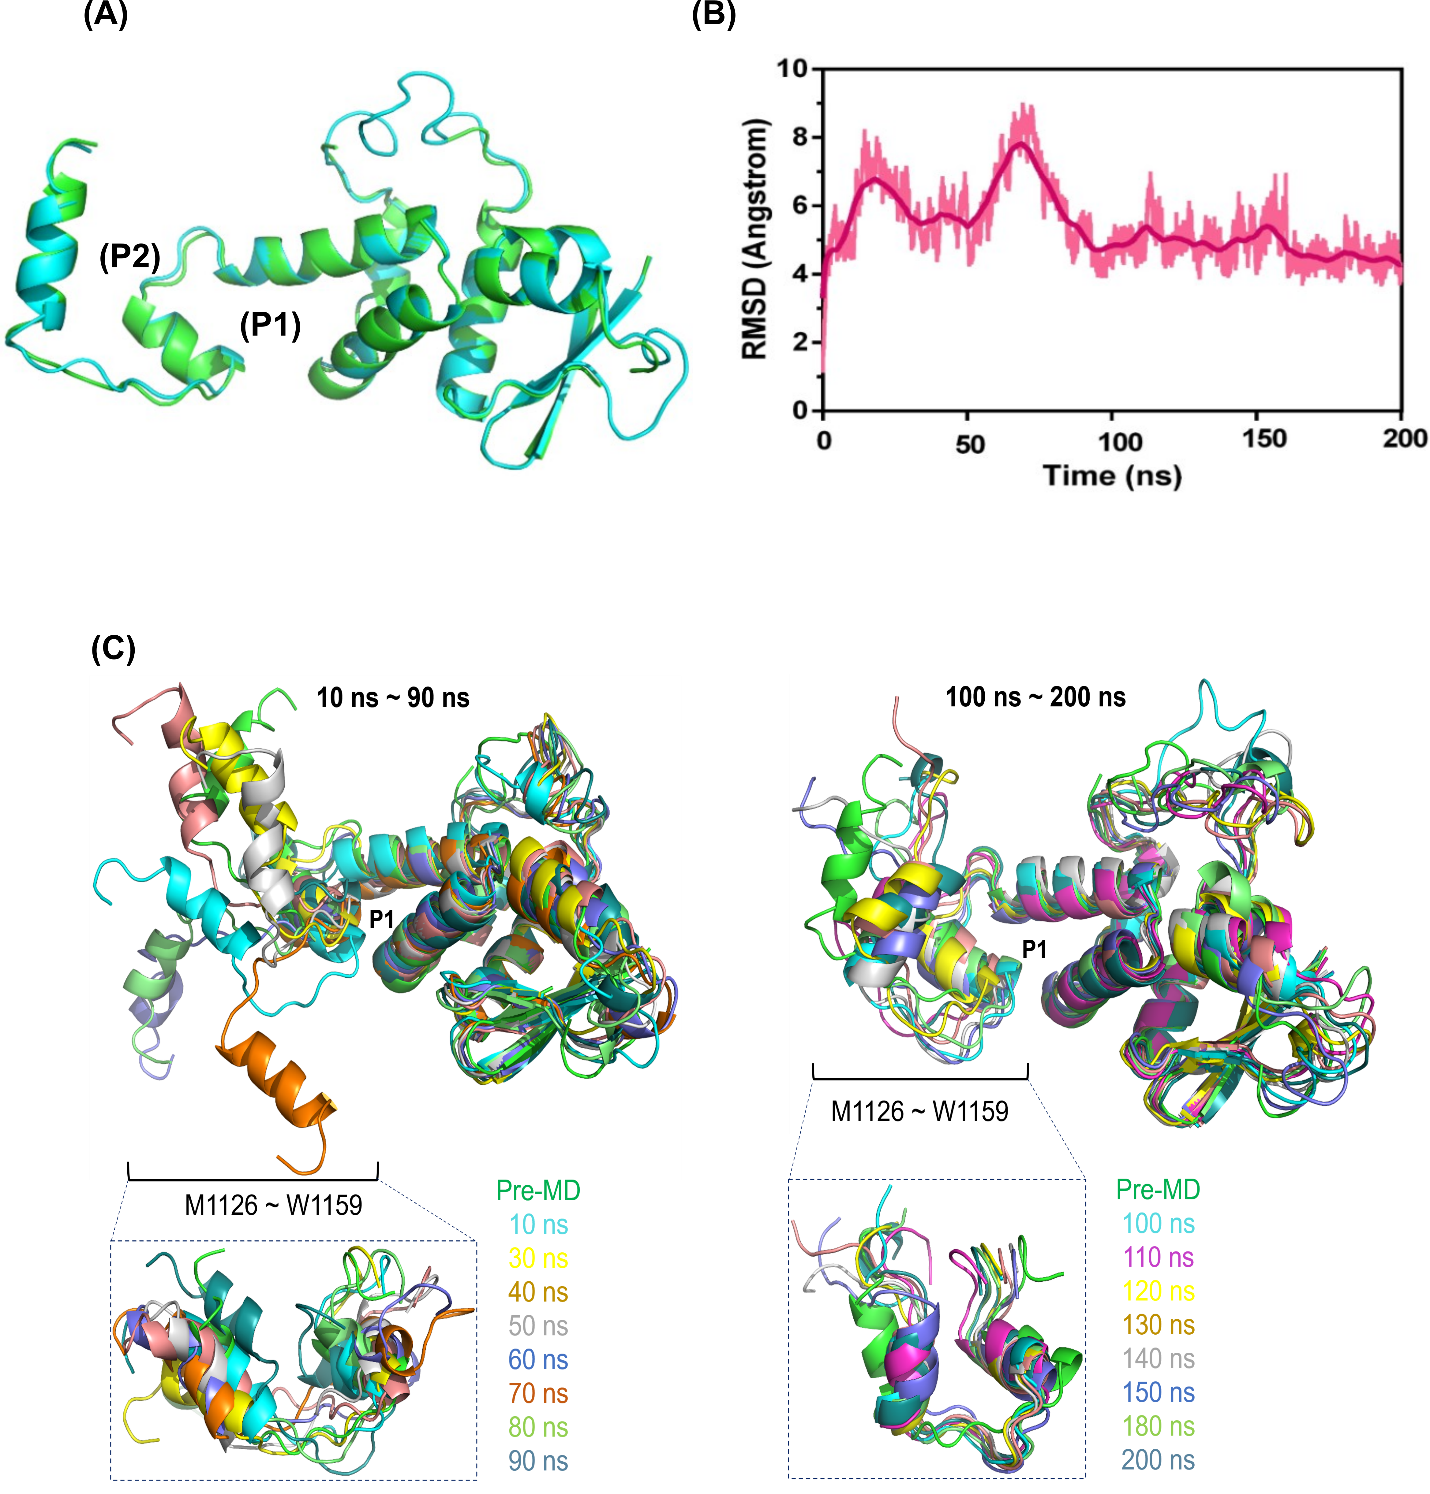


**Figure S1**: Molecular dynamics of Skp1. (A) The Skp1 model (cyan) used for MD simulations was generated and adopted from our previous study 21. (B) RMSD profile of apo Skp1 generated from 200 ns MD simulations. (C) Conformational analysis of H8-helix region of Skp1 across MD trajectory, highlighting local flexibility and dynamic behavior.


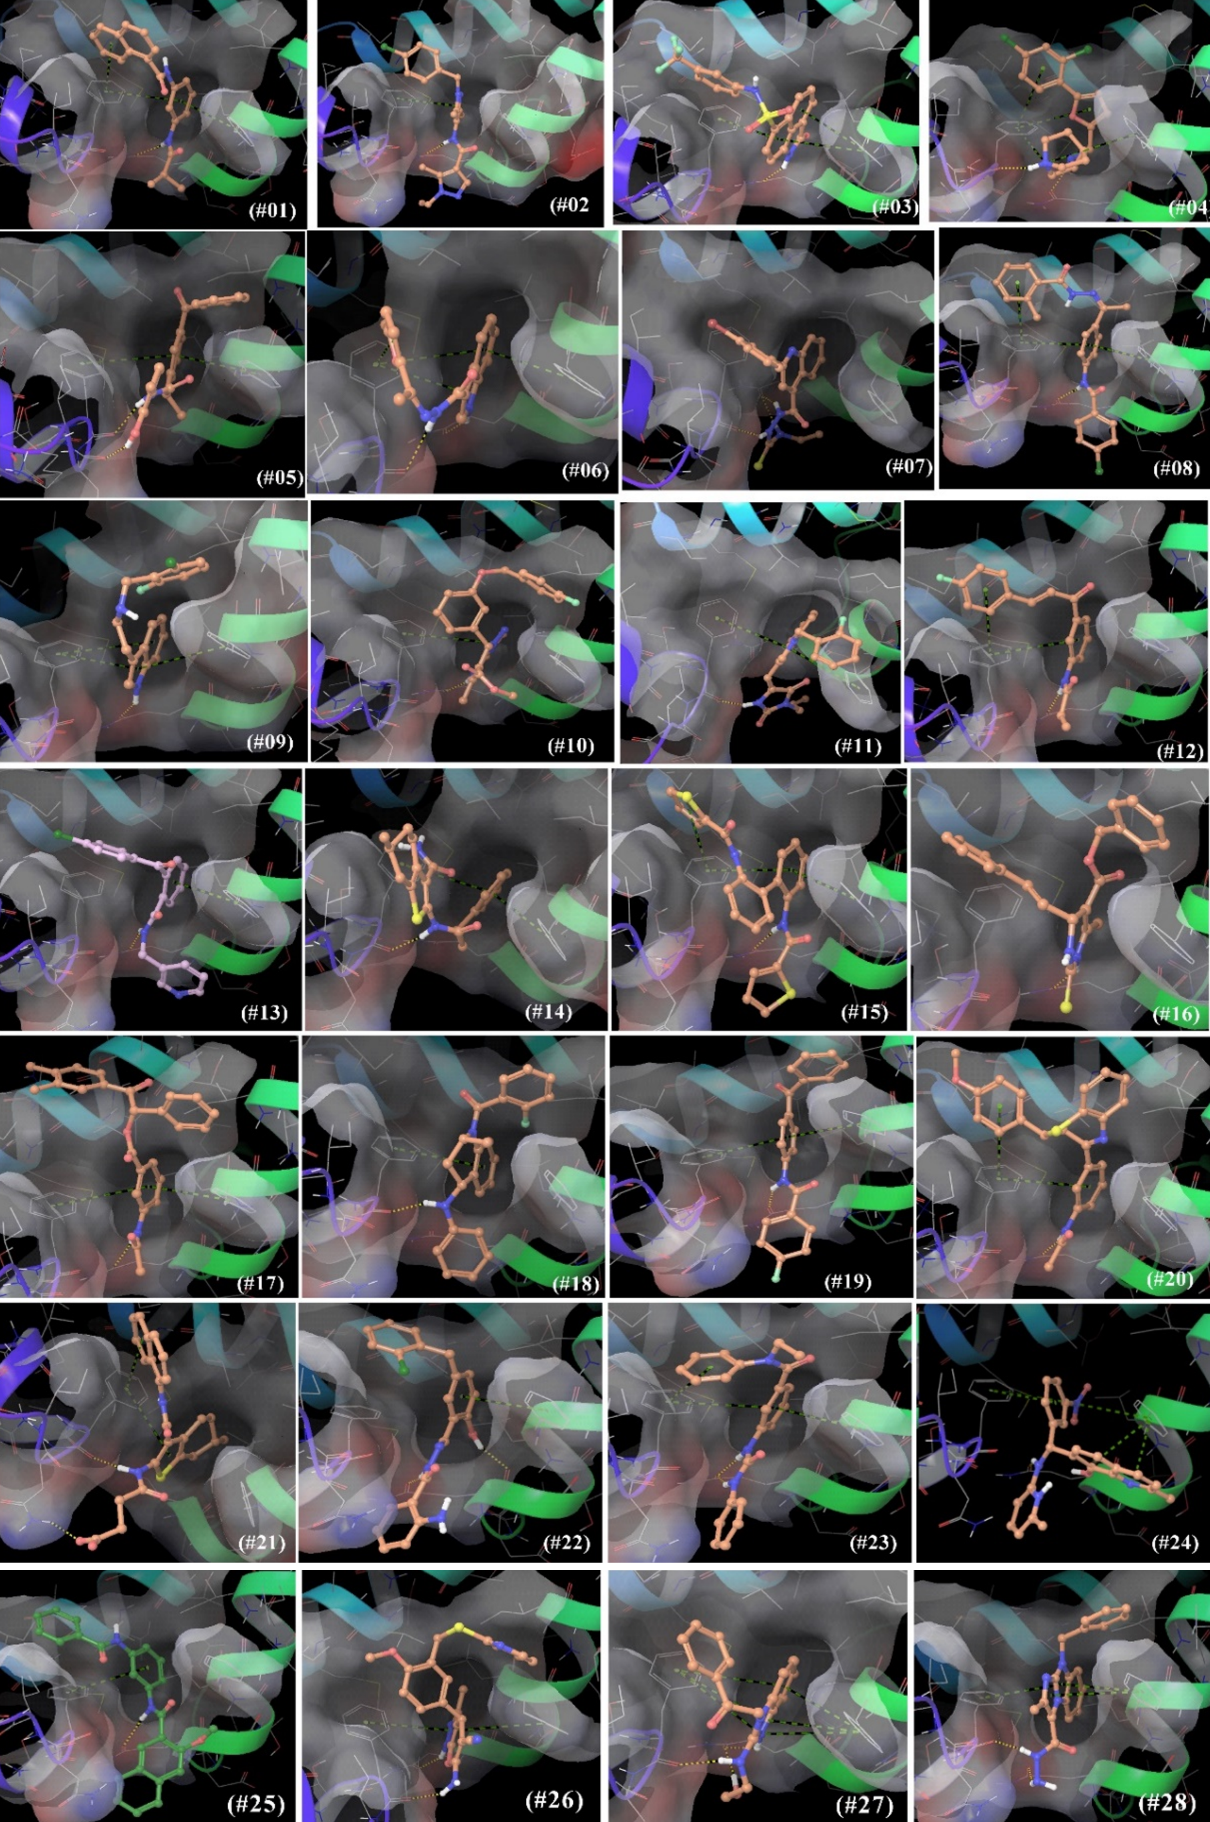


**Figure S2**: Glide binding poses of 28 compounds selected from SBVS. # denotes compound number. Green dotted lines indicate π-π or π-cation interactions, while the yellow dotted lines represent H-bonding interactions.
